# Supplementary material for: Modelling and prediction of the thermophysical properties of aqueous mixtures of choline geranate and geranic acid (CAGE) using SAFT-γ Mie
Source: PubMed Central journal article supplement — RSC Adv. 2019 Nov 21;9(65):38017–31. doi: 10.1039/c9ra07057e (PMC9075776; doi:10.1039/c9ra07057e), 2019-11-21

Spectroscopic data for CAGE

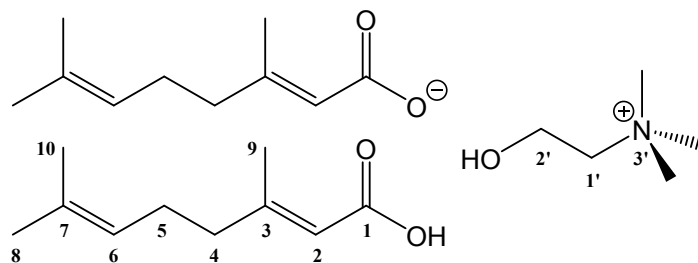

<sup>1</sup>H NMR spectrum:

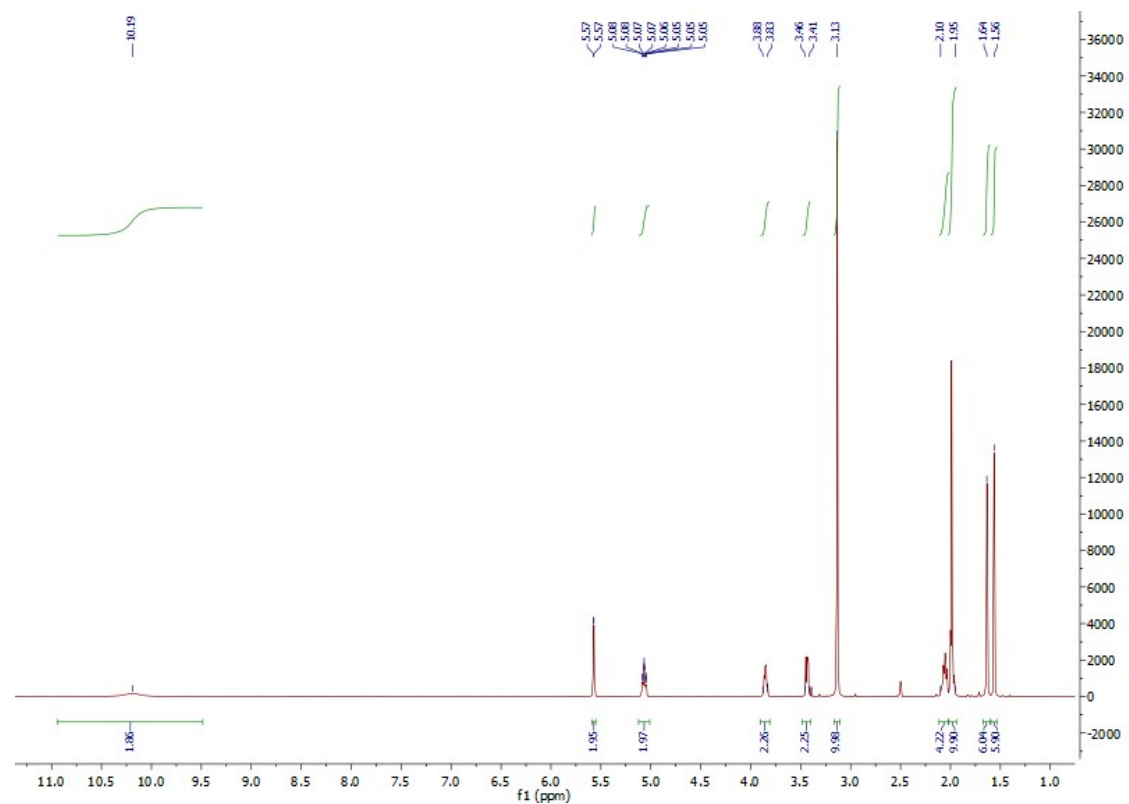

$^{13}\text{C}\{^1\text{H}\}$  NMR spectrum:

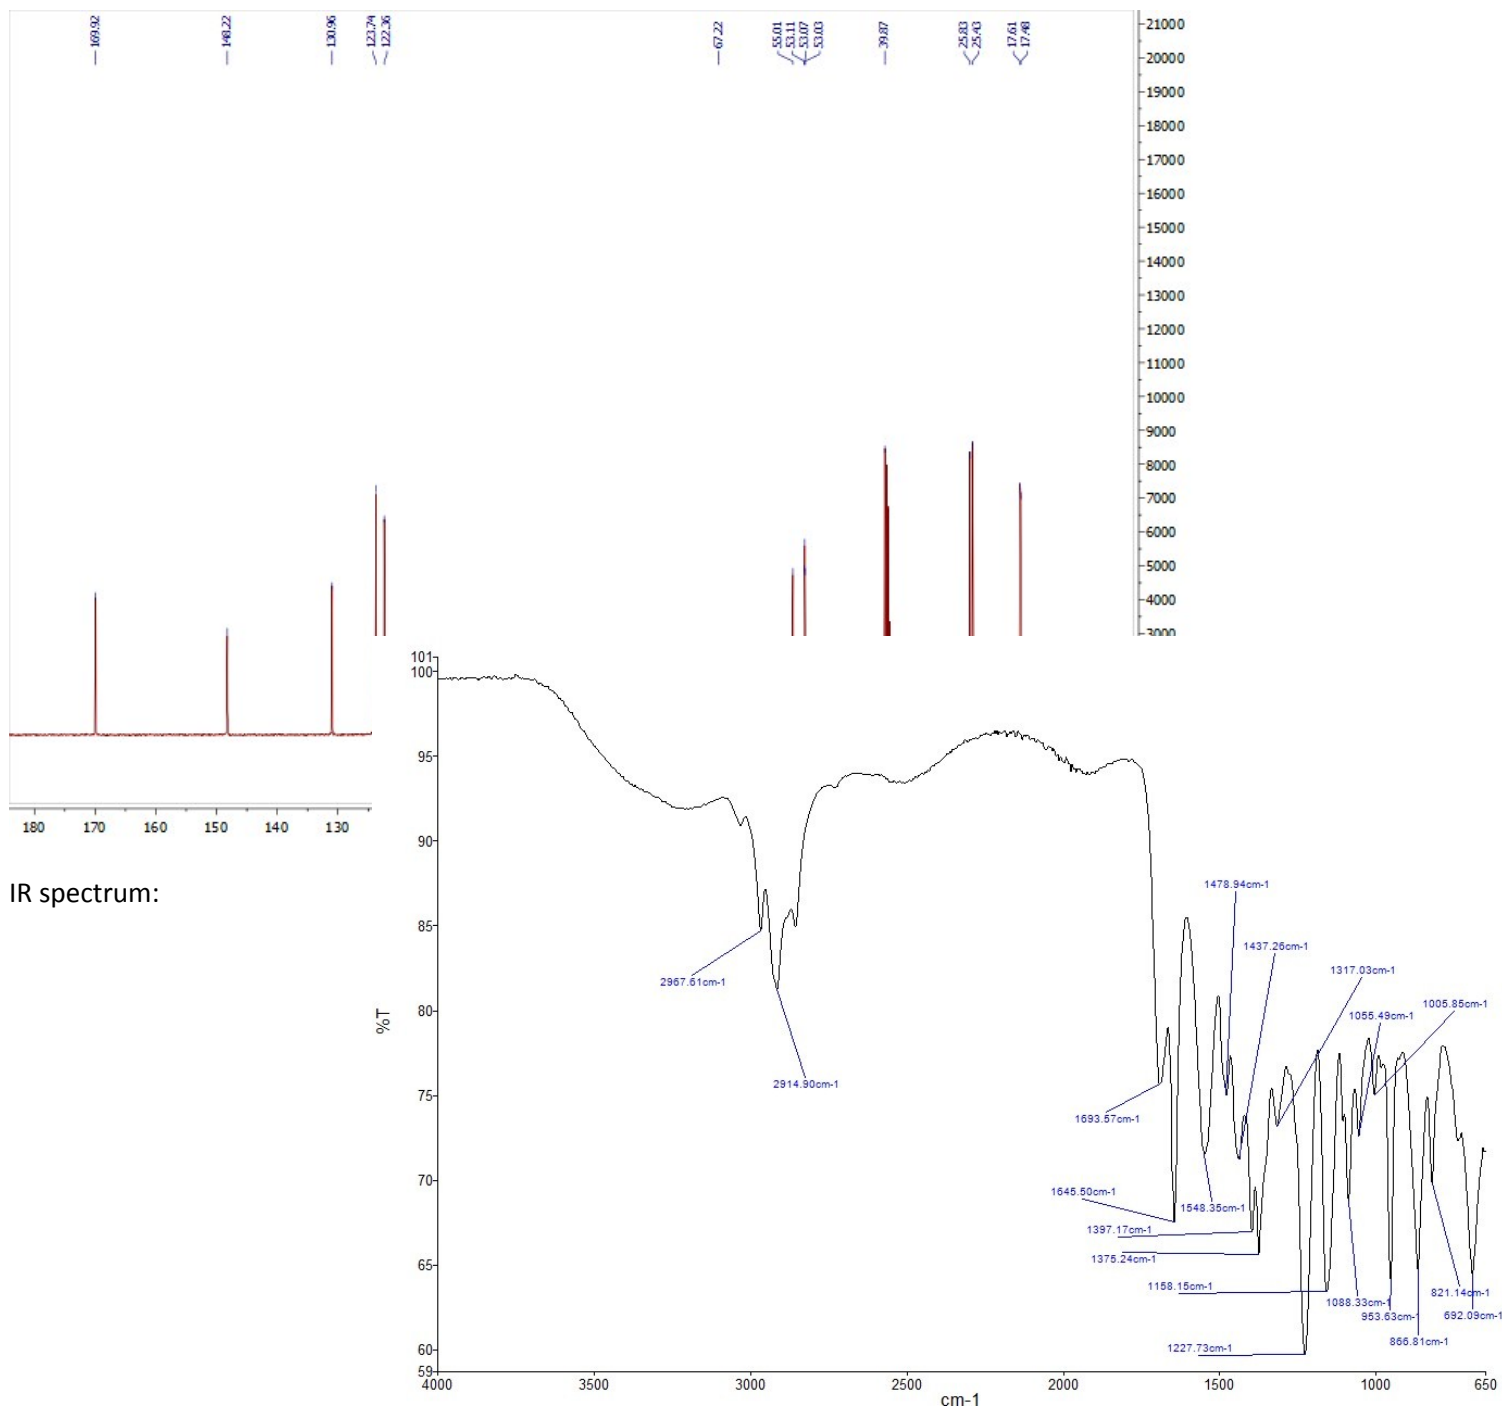

IR spectrum:

Mass spectrum (negative ion)  $m/z = 50-1000$  Da.

DPNEG1 16 (0.140) Cm (14:30)

ACQ-SQD#LBA1011

03-Oct-2019 11:59:56  
Scan ES-  
7.53e7

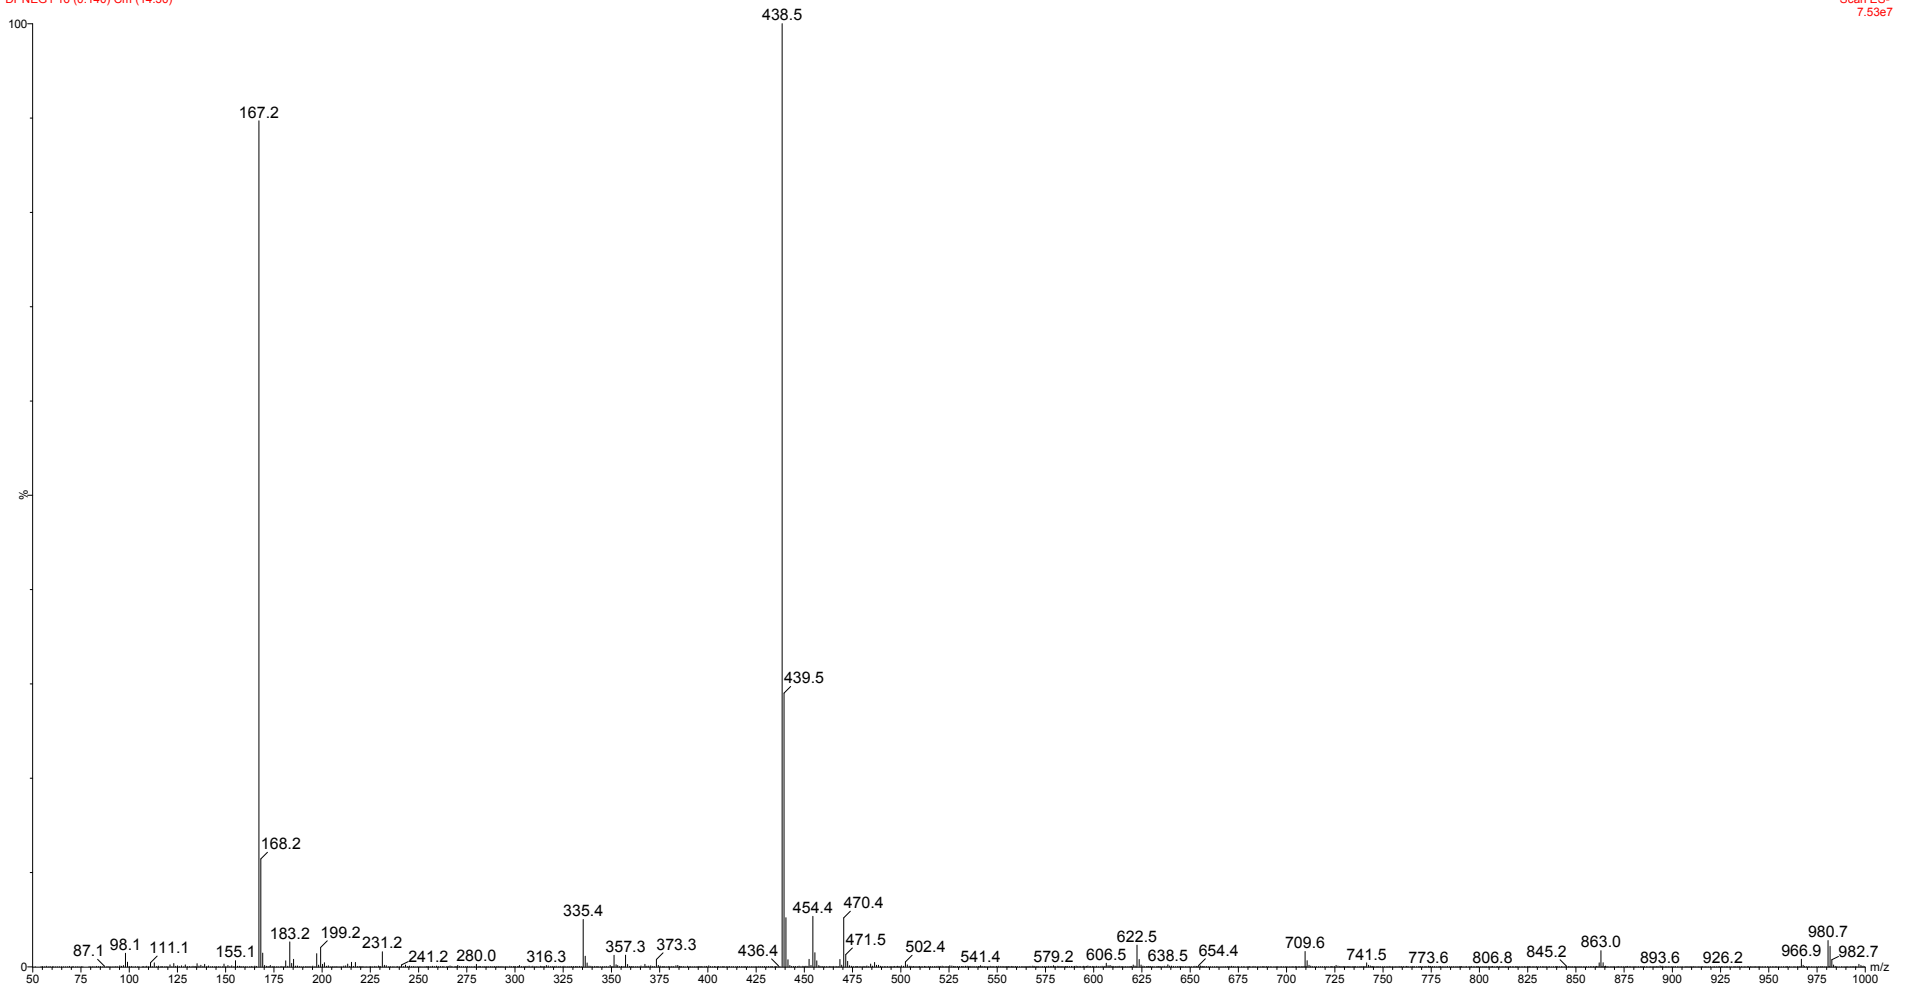

Mass spectrum (positive ion)  $m/z = 50-1000$  Da.

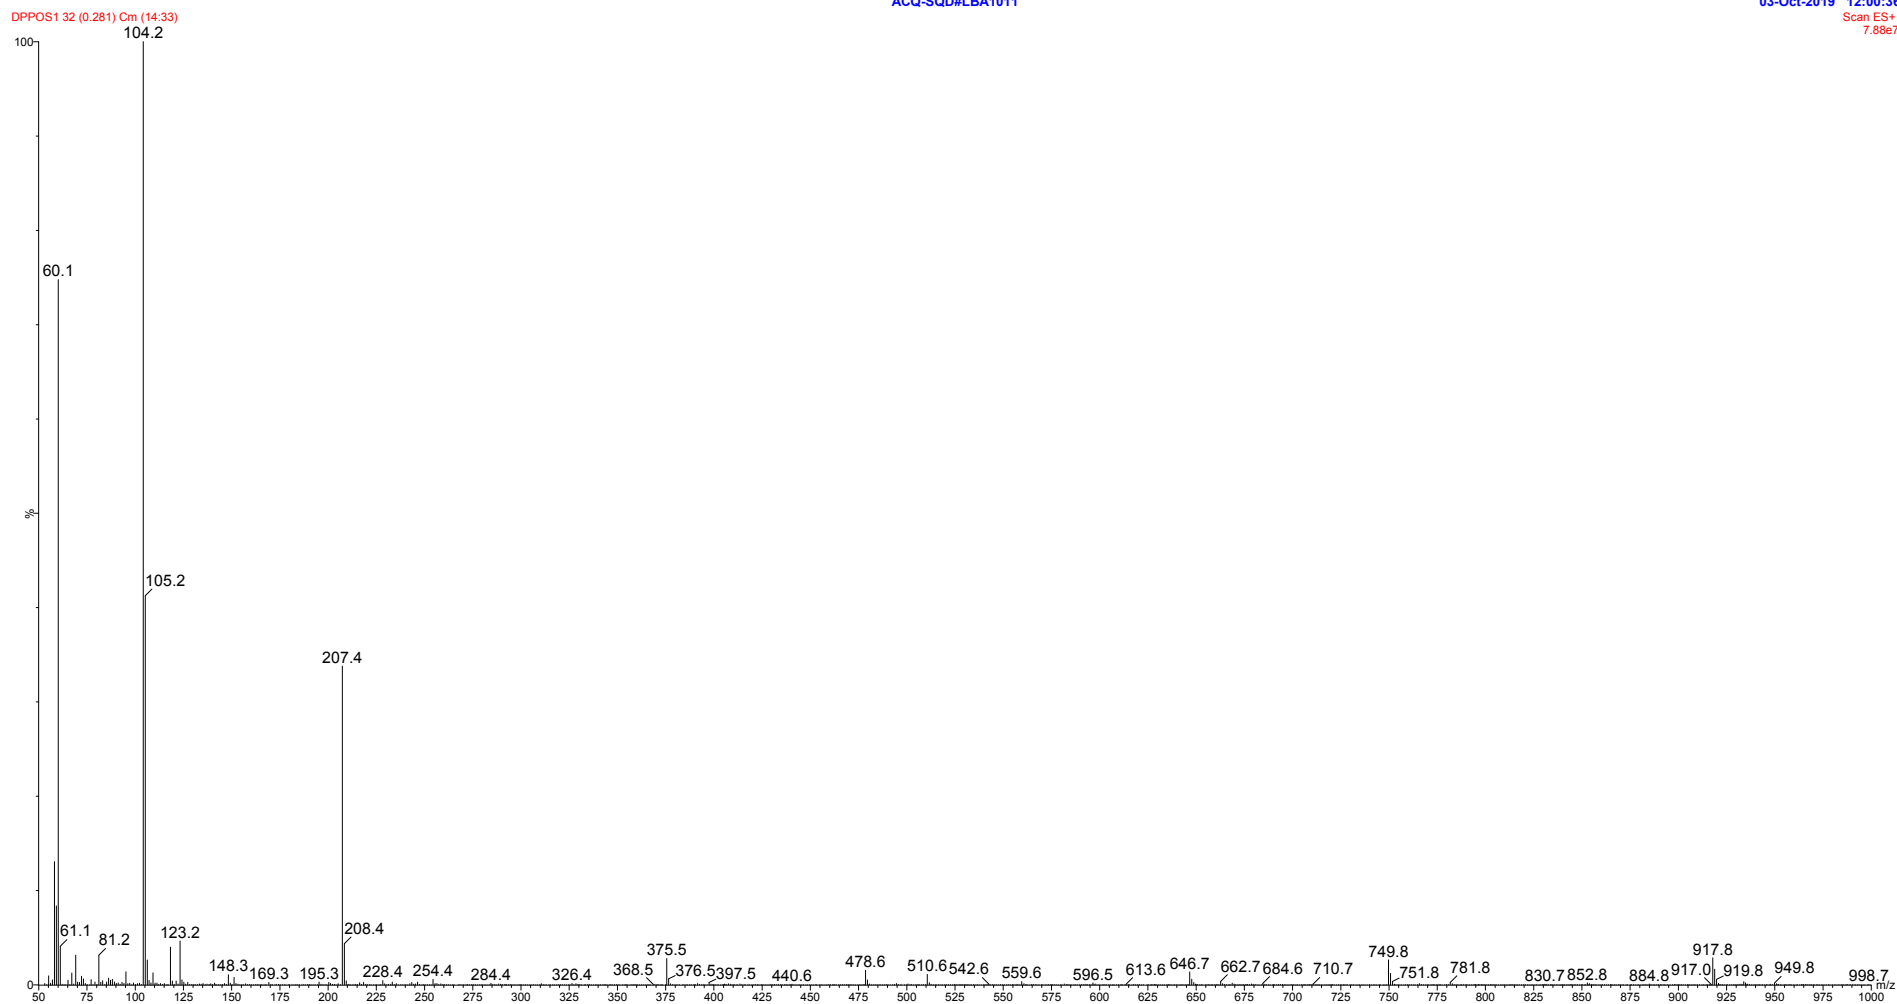

Supplement: RA-009-C9RA07057E-s001.pdf [file RA-009-C9RA07057E-s001.pdf]
